# Supplementary material for: Development of an In Vivo Extended-Spectrum Cephalosporin-Resistant Escherichia coli Model in Post-Weaned Pigs and Its Use in Assessment of Dietary Interventions
Source: MDPI journal article supplement (doi:10.3390/ani13060959), 2023-03-07
Supplement: s1 [file s1]

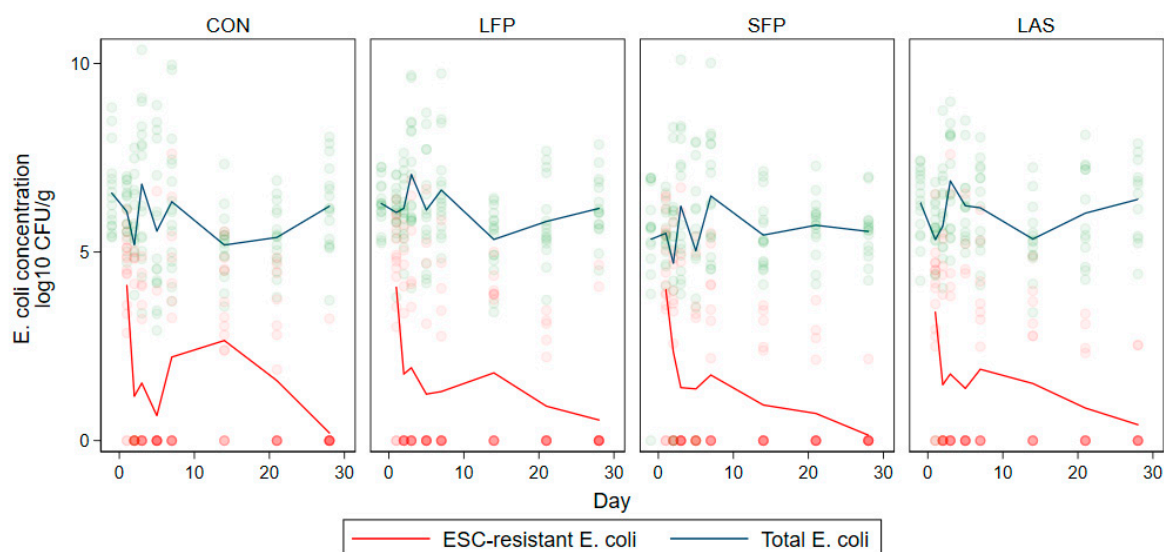

**Supplementary Figure S1.** Mean concentration of ESC-resistant *E. coli* and total *E. coli* in rectal swabs from ESC-resistant *E. coli* challenged weaners belonging to different treatment groups. Line represents median with individual pigs represented by dots (overlapping of individual pig data results in darker dots in graph). Treatment abbreviations: CON = control diet, LFP = CON + 2,000 ppm *Lactobacillus acidophilus* fermentation product (LFP), SFP = CON + 2,000 ppm *Saccharomyces cerevisiae* fermentation product (SFP), LAS = CON + 2,000 ppm LFP + 2,000 ppm SFP.

**Supplementary Table S1.** Calculated composition of experimental diets fed to ESC-resistant *E. coli* challenged weaners.

|                      | CON  | LFP  | SFP  | LAS  |
|----------------------|------|------|------|------|
| Ash (g/100g)         | 5.3  | 5.5  | 5.2  | 4.9  |
| Crude Fibre (g/100g) | 2.9  | 2.2  | 2.3  | 2.4  |
| Total fat (g/100g)   | 4.5  | 2.4  | 4.9  | 4.8  |
| Moisture (g/100g)    | 9.5  | 10.1 | 9.4  | 10.3 |
| NFE (g/100g)         | 57.0 | 57.3 | 58.2 | 57.5 |

Treatment abbreviations: CON = control diet, LFP = CON + 2,000 ppm *Lactobacillus acidophilus* fermentation product (LFP), SFP = CON + 2,000 ppm *Saccharomyces cerevisiae* fermentation product (SFP), LAS = CON + 2,000 ppm LFP + 2,000 ppm SFP, NFE = nitrogen-free extract.
